# Supplementary material for: The complexity of protein interactions unravelled from structural disorder
Source: PubMed Central journal article supplement (PMC7846008; doi:10.1371/journal.pcbi.1008546), 2021-01-08

b - factor

B - factor

— DTO is IR    — DTO not IR    — structured is IR    — structured not IR

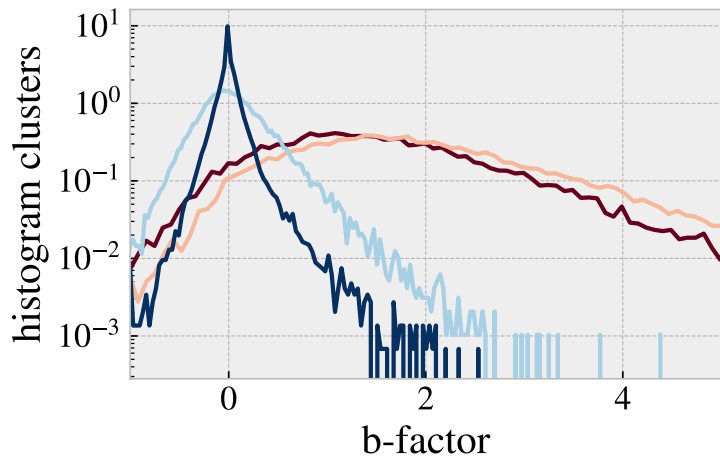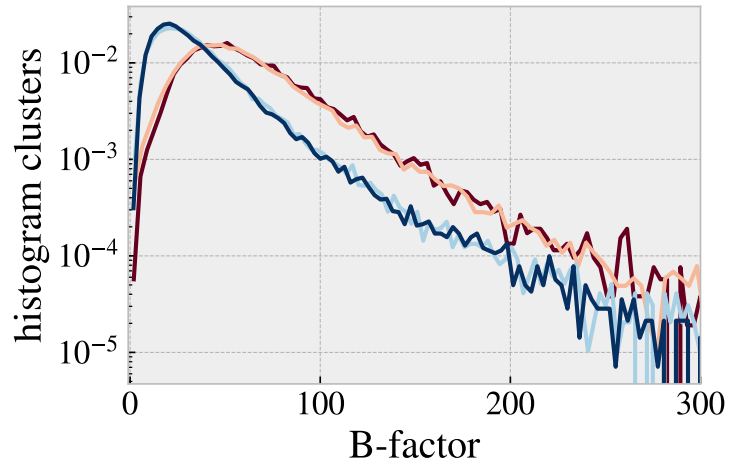

— next to missing    — not next to missing

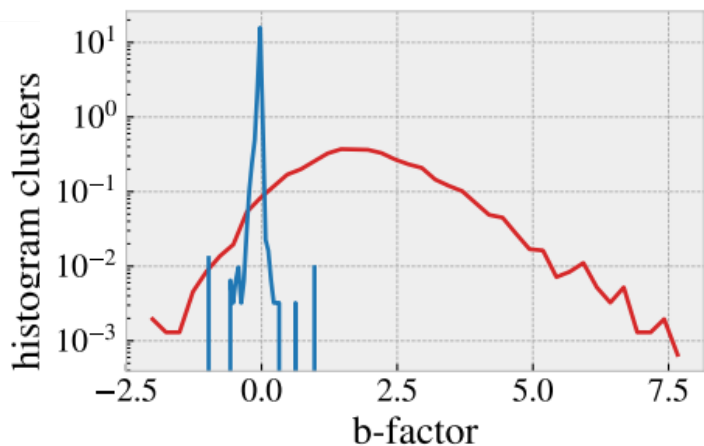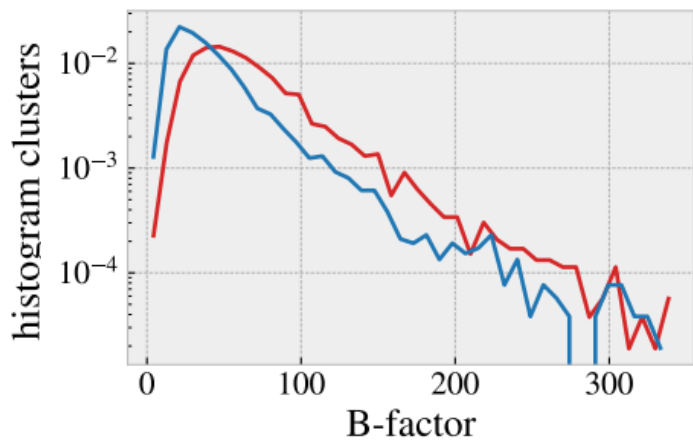

— SPOT: disordered    — IUPred: disordered    — DISOPRED: disordered  
— SPOT: structured    — IUPred: structured    — DISOPRED: structured

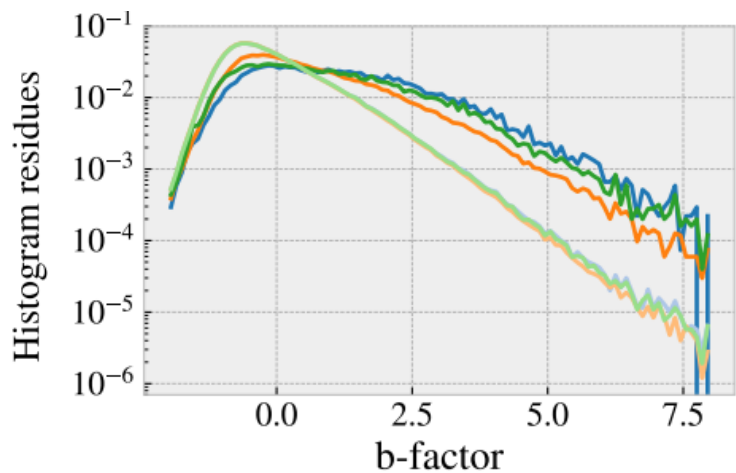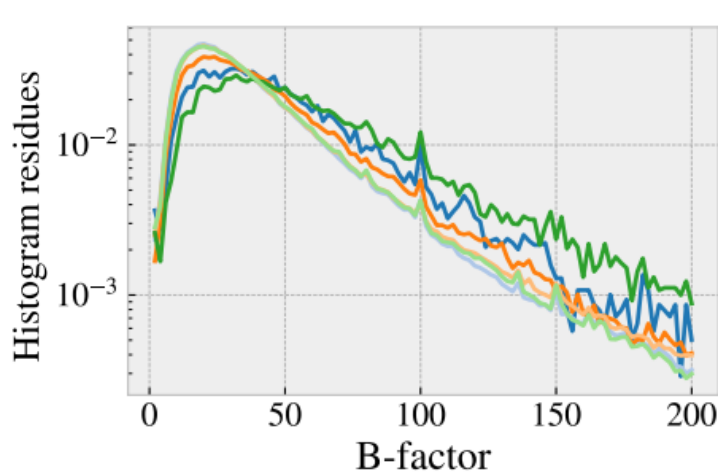

Supplement: pcbi.1008546.s004.pdf [file pcbi.1008546.s004.pdf]
