# Supplementary material for: The complexity of protein interactions unravelled from structural disorder
Source: PubMed Central journal article supplement (PMC7846008; doi:10.1371/journal.pcbi.1008546), 2021-01-08

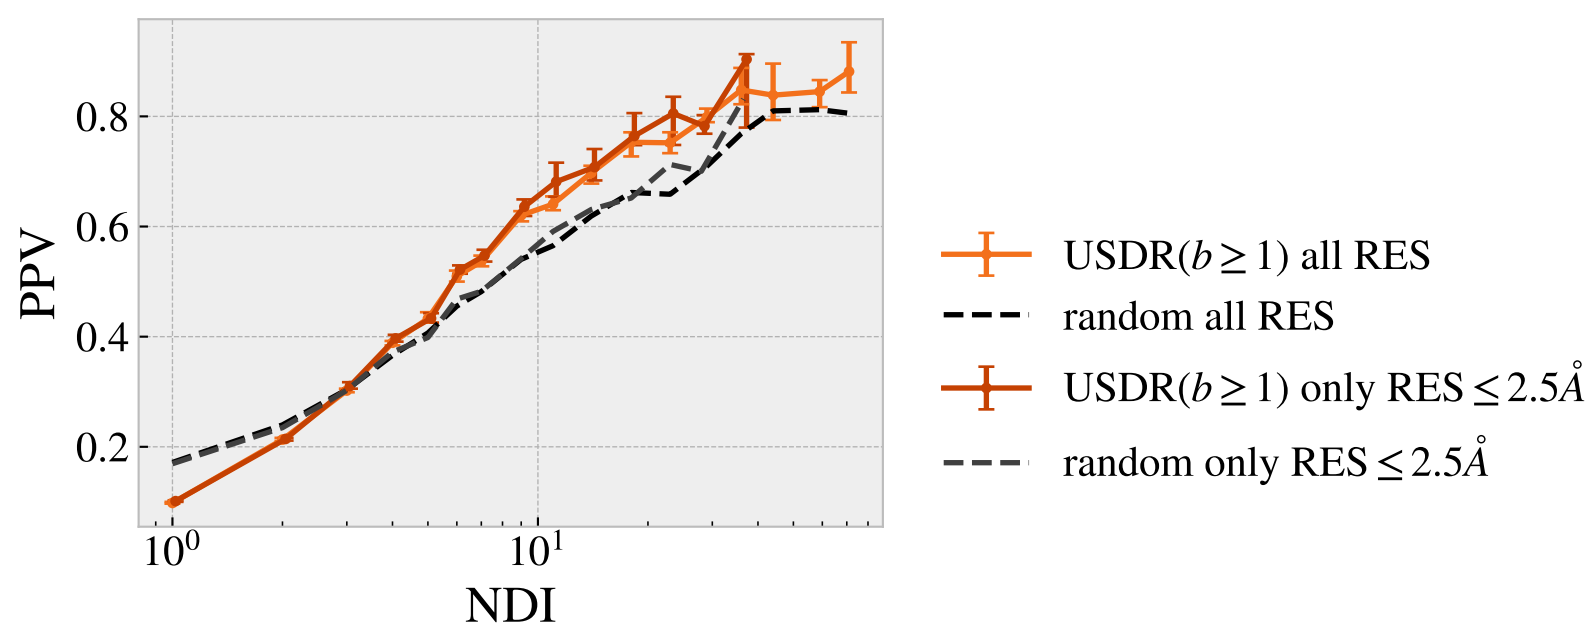

Supplement: pcbi.1008546.s009.pdf [file pcbi.1008546.s009.pdf]
